# Supplementary material for: Photon and particle radiotherapy induce redundant modular chemotaxis of human lymphocytes
Source: JCI journal article supplement (doi:10.1172/jci.insight.190149), 2025-08-14
Supplement: sd2 [file 2]

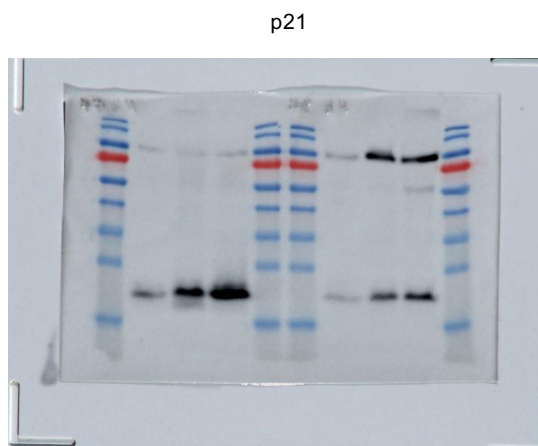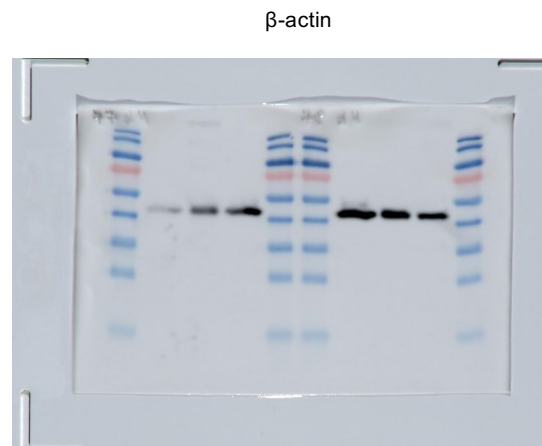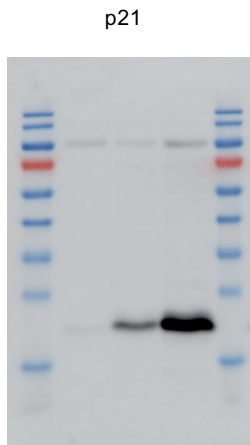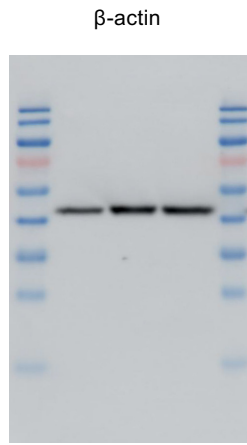

**Full unedited western blot gels.** Related to Figure 2B. Shown are full length original immunoblot images for p21 and  $\beta$ -actin expression in pancreatic tumor explants treated with 0 Gy, 10 Gy or 20 Gy. Lanes from left to right: patient #1 0Gy, patient #1 10Gy, patient #1 20Gy, patient #2 0Gy, patient #2 10Gy, patient #2 20Gy (upper panel); patient #4 0Gy, patient #4 10Gy, patient #4 20Gy (lower panel).
